# Supplementary material for: Super-enhancer-driven MLX mediates redox balance maintenance via SLC7A11 in osteosarcoma
Source: PubMed Central journal article supplement (PMC10352384; doi:10.1038/s41419-023-05966-y), 2023-07-17

Uncropped images for Fig. 1D (MLX)

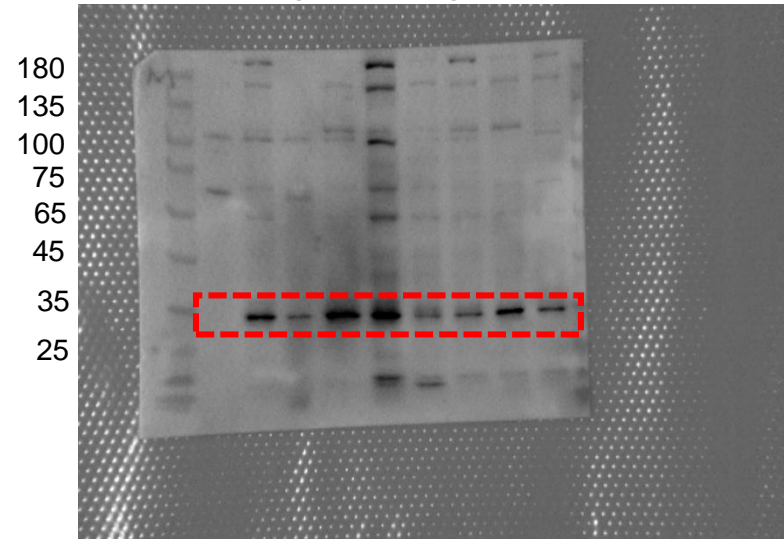

Uncropped images for Fig. 1D ( $\beta$ -actin)

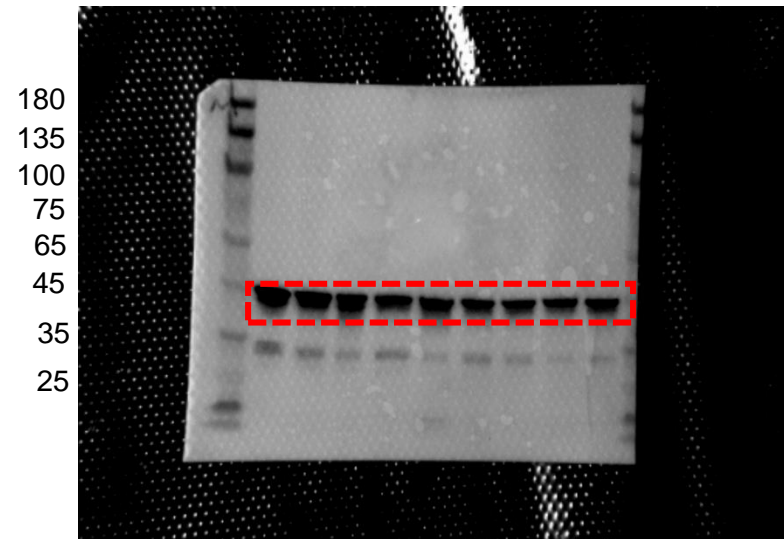

Uncropped images for Fig. 3D (SLC7A11 and Tubulin in 143B)

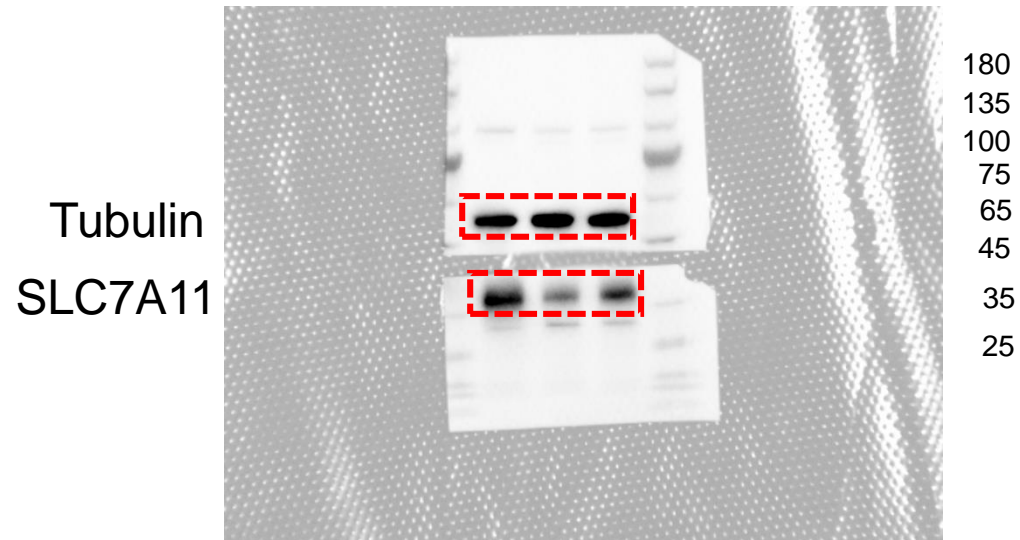

Uncropped images for Fig. 3D (SLC7A11 and Tubulin in SJSA1)

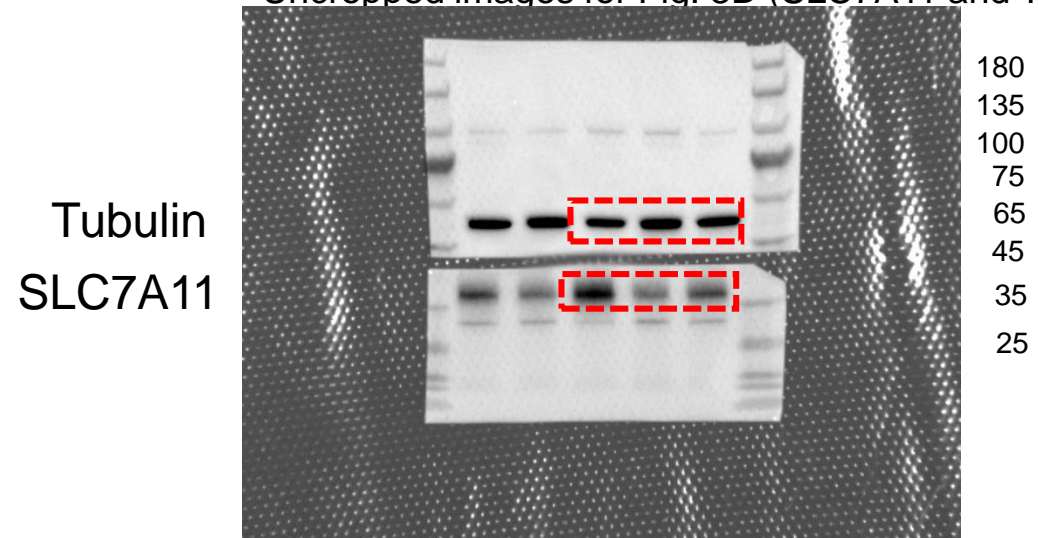

Uncropped images for Fig. S3b (SLC7A11)

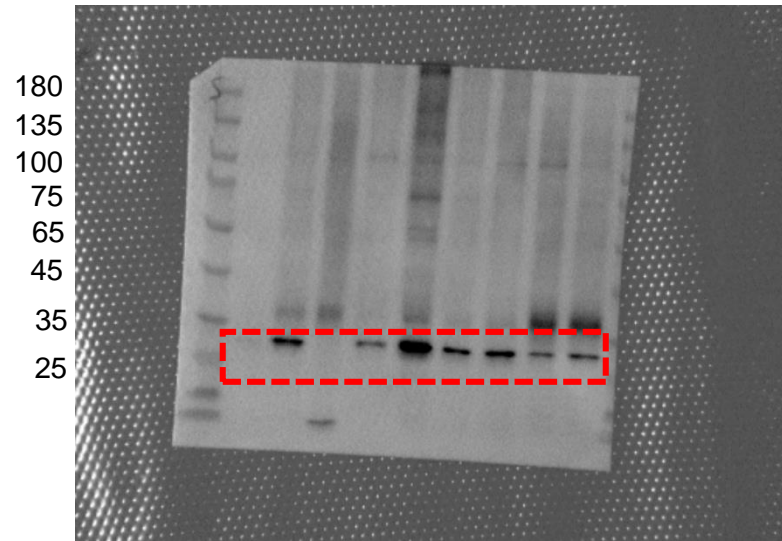

Uncropped images for Fig. S3b ( $\beta$ -actin)

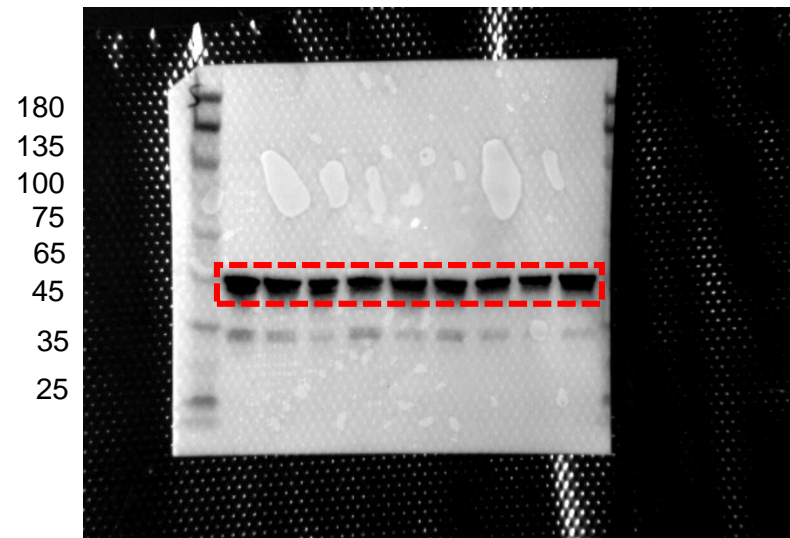

Uncropped images for Fig. 4E (MLX in 143B)

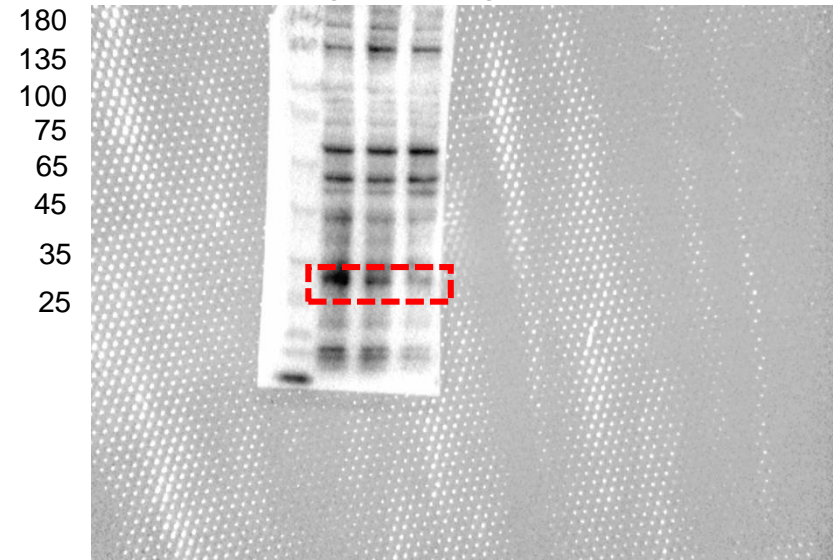

Uncropped images for Fig. 4E (4-HNE in 143B)

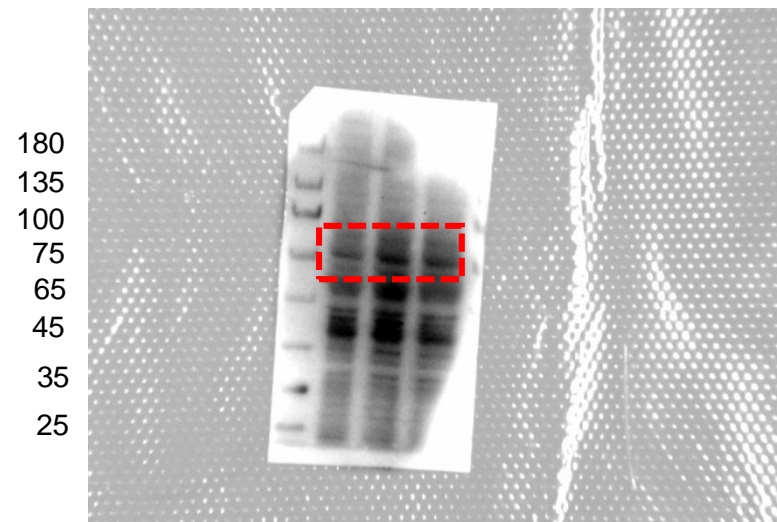

Uncropped images for Fig. 4E ( $\beta$ -actin in 143B)

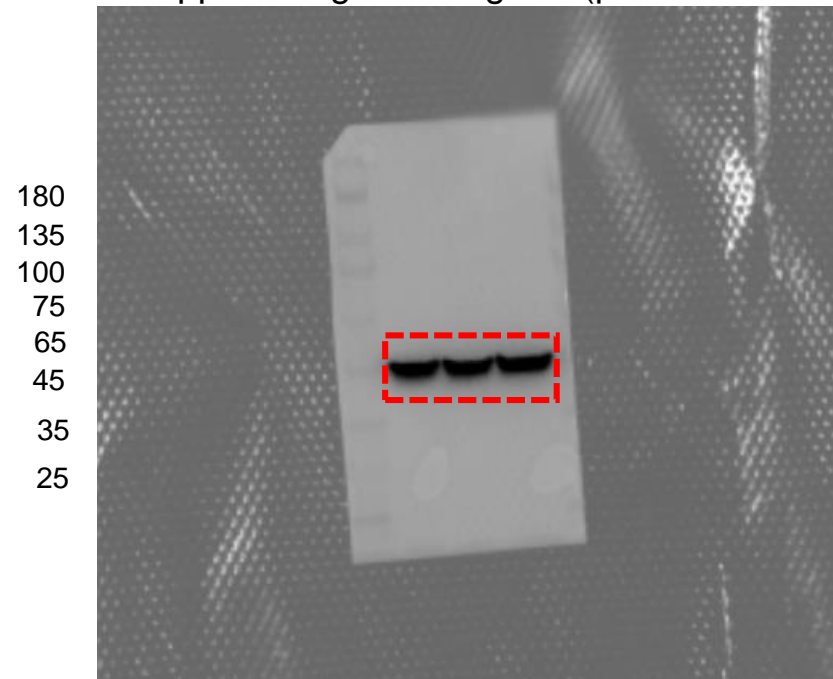

Uncropped images for Fig. 4F (CD71/TRC、Transferrin、SLC40A1/FPN1、 FTH1 and  $\beta$ -actin in 143B)

CD71/ TRC

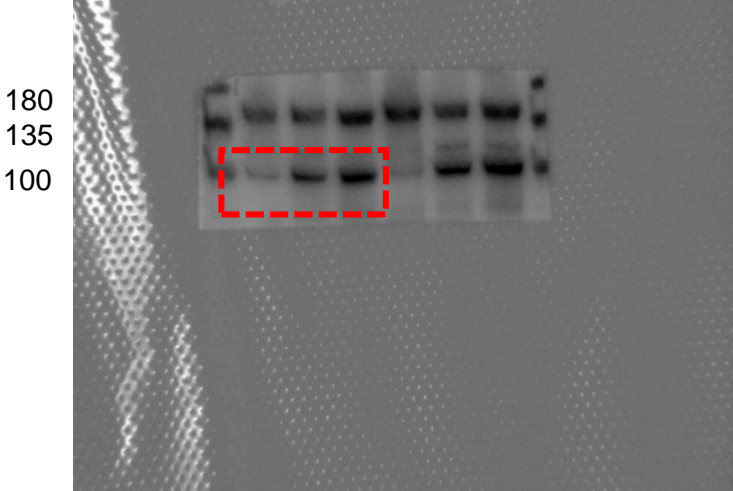

Transferrin

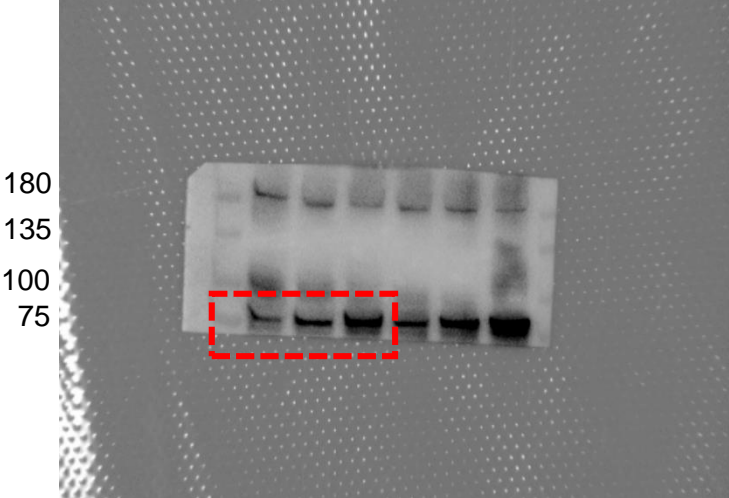

$\beta$ -actin

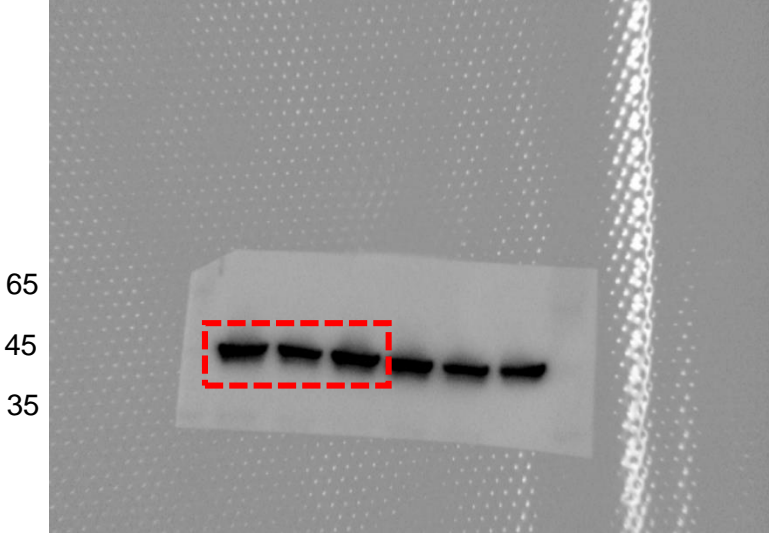

SLC40A1/FPN1

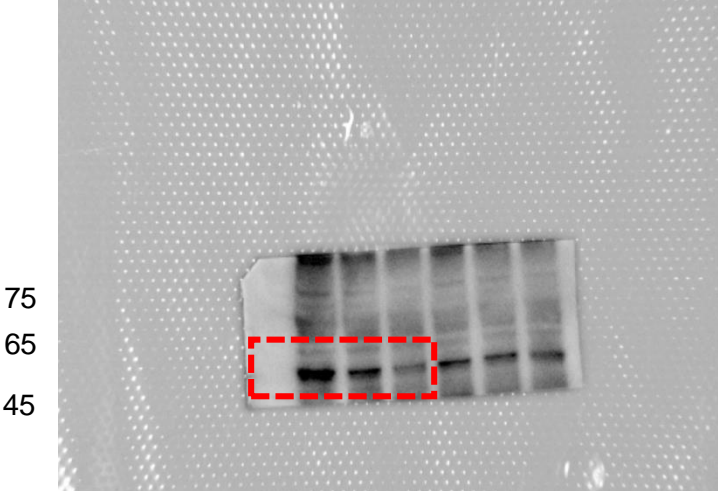

FTH1

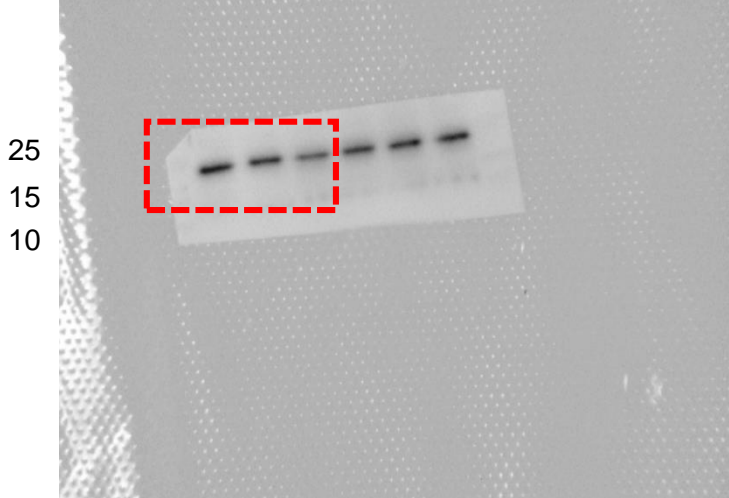

Uncropped images for Fig. S4b (Tubulin, Caspase-3 and cleaved caspase-3 in 143B)

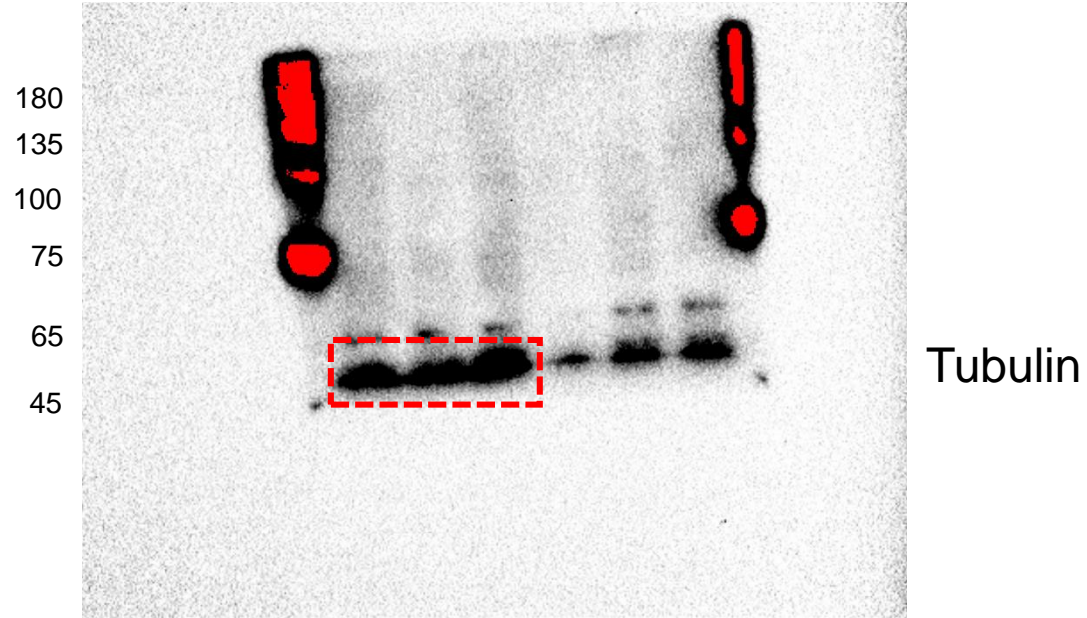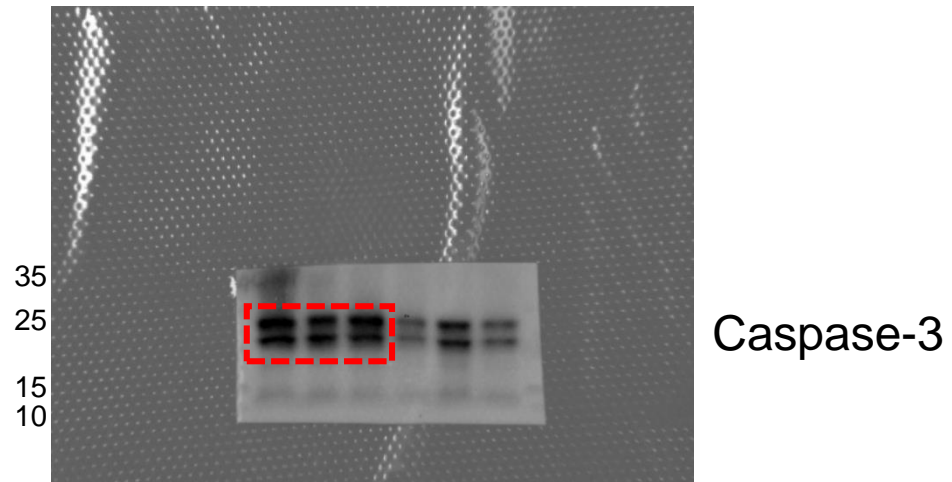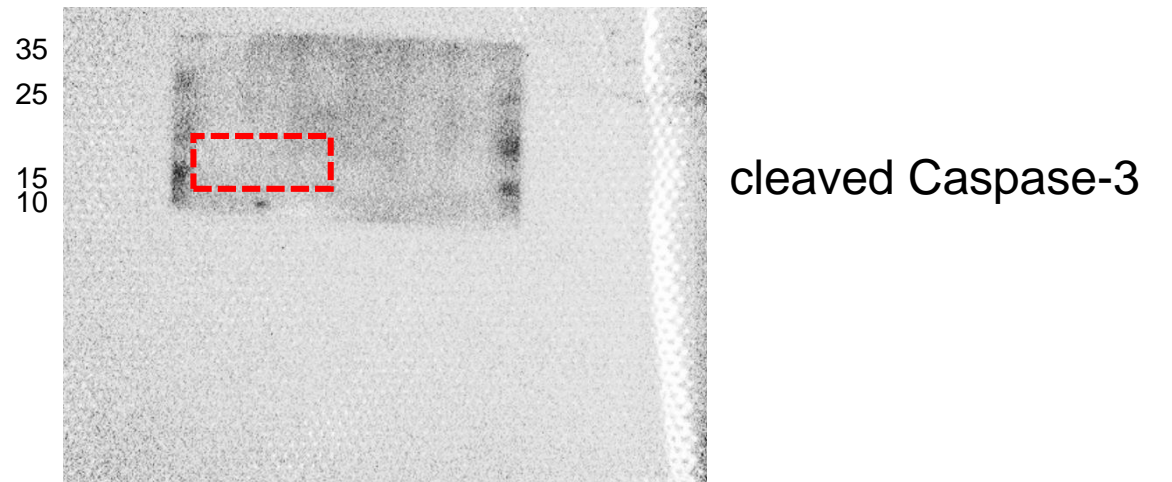

Uncropped images for Fig. 5A (SLC7A11 in 143B)

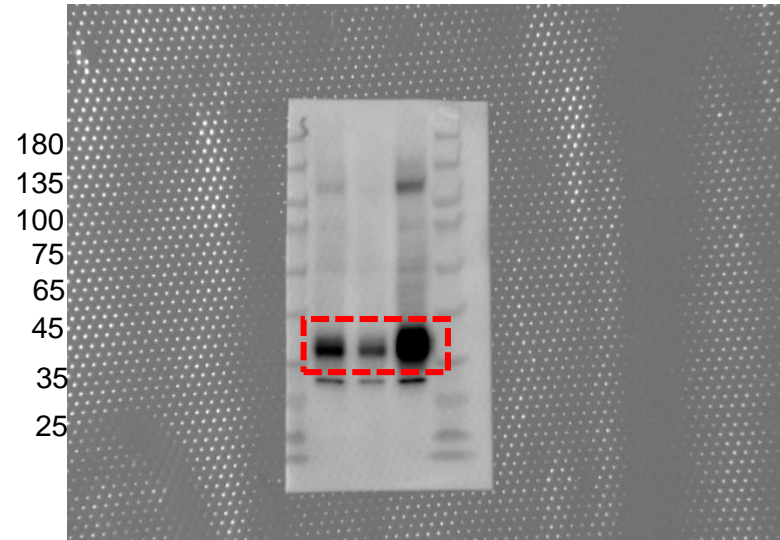

Uncropped images for Fig. 5A (MLX in 143B)

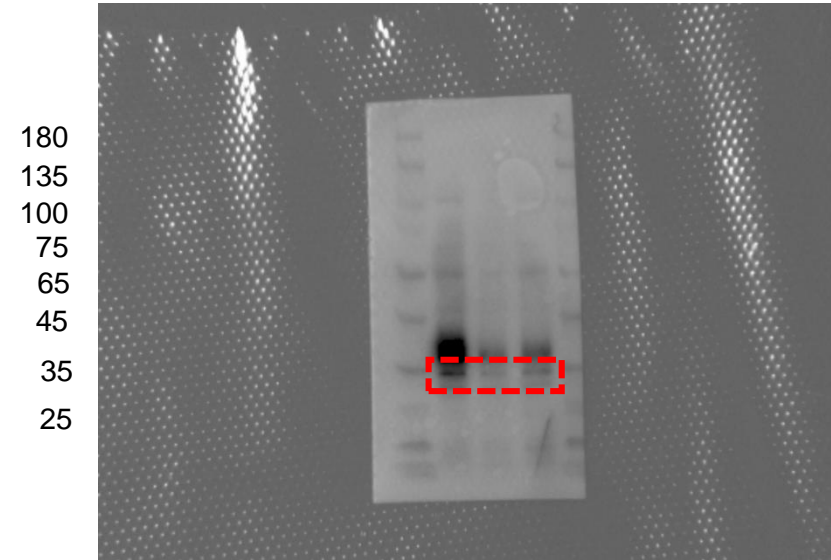

Uncropped images for Fig. 5A ( $\beta$ -actin in 143B)

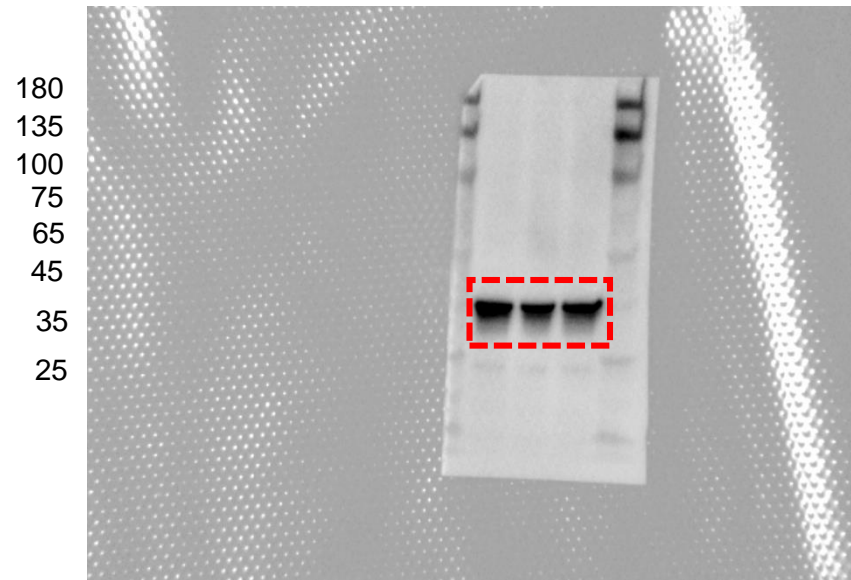

Uncropped images for Fig. 5A (SLC7A11 in SJSA1)

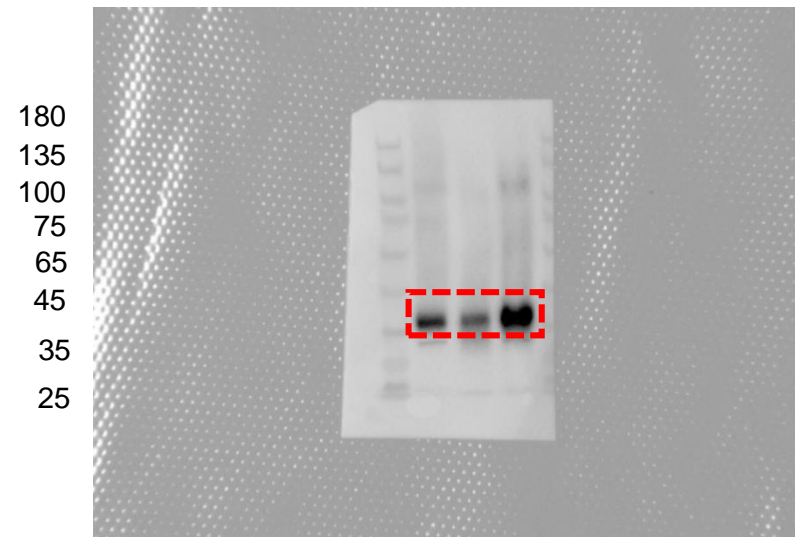

Uncropped images for Fig. 5A (MLX in SJSA1)

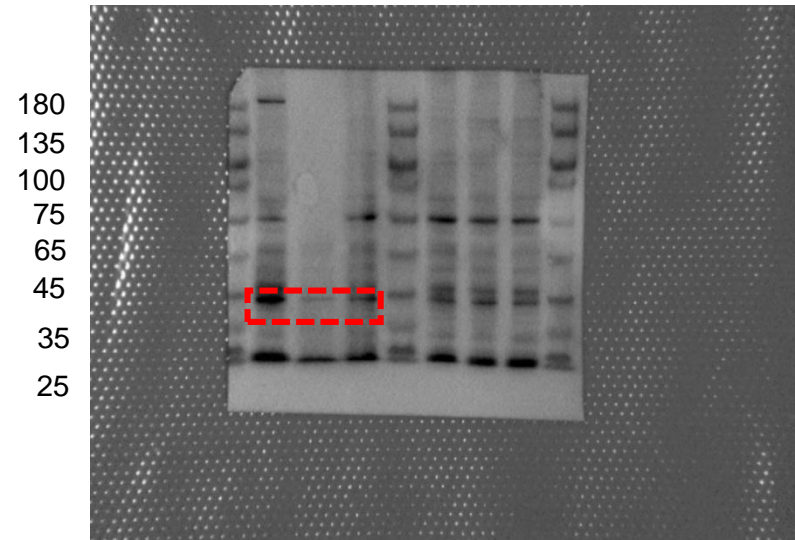

Uncropped images for Fig. 5A ( $\beta$ -actin in SJSA1)

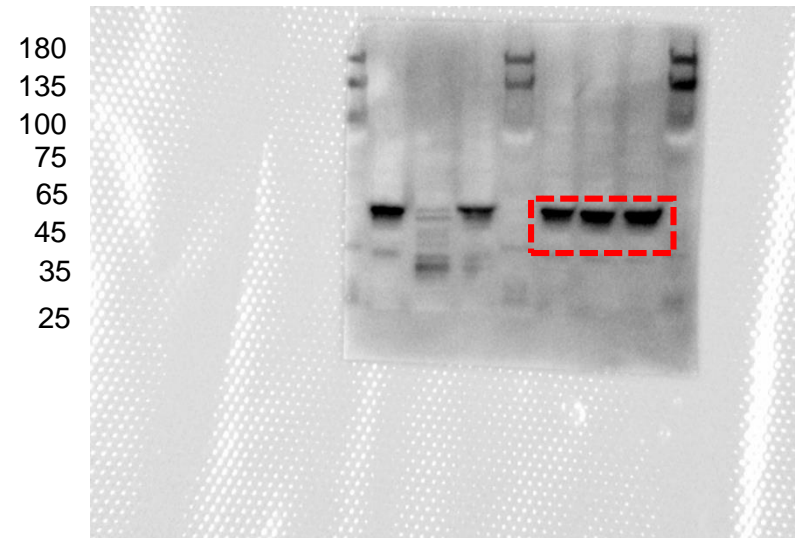



Uncropped images for Fig. S5a (SLC7A11 in 143B)

180  
135  
100  
75  
65  
45  
35  
25

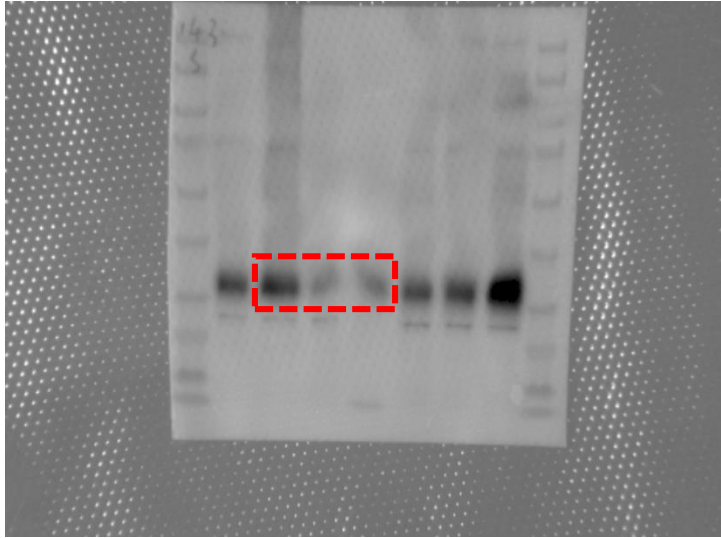

Uncropped images for Fig. S5a (SLC7A11 in SJSA1)

180  
135  
100  
75  
65  
45  
35  
25

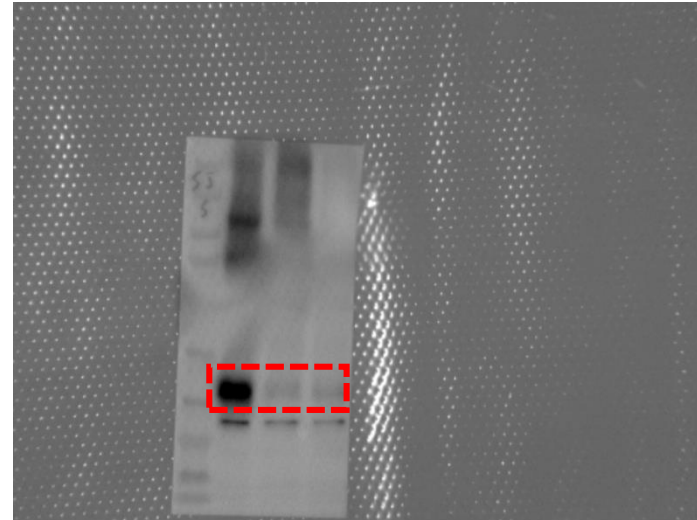

Uncropped images for Fig. S5a ( $\beta$ -actin in 143B)

180  
135  
100  
75  
65  
45  
35  
25

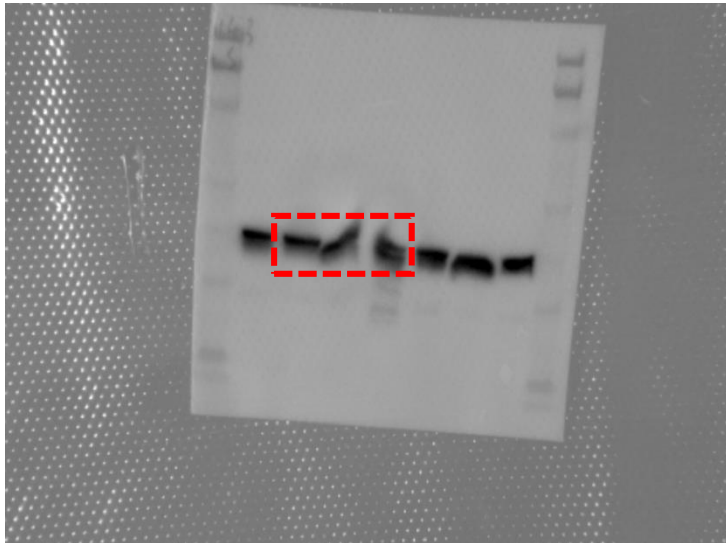

Uncropped images for Fig. S5a ( $\beta$ -actin in SJSA1)

180  
135  
100  
75  
65  
45  
35  
25

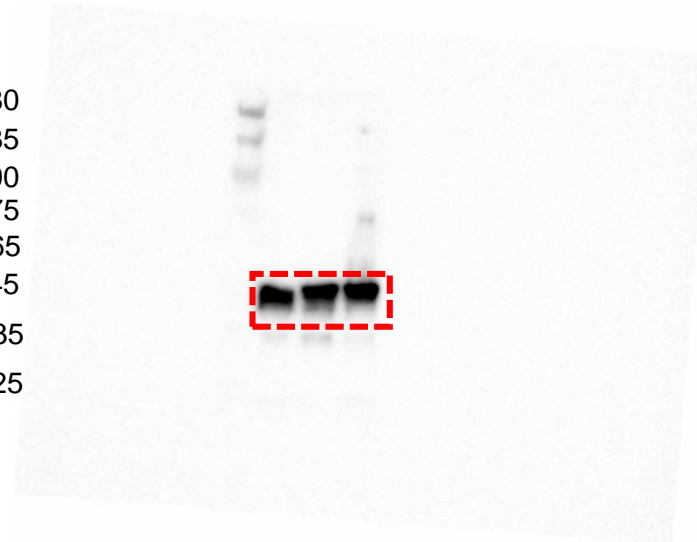

Supplement: 41419_2023_5966_MOESM4_ESM.pdf [file 41419_2023_5966_MOESM4_ESM.pdf]
